# Supplementary material for: Fractionation of Glycomacropeptide from Whey Using Positively Charged Ultrafiltration Membranes
Source: MDPI journal article supplement (doi:10.3390/foods7100166), 2018-10-09
Supplement: s1 [file s1]

Supplementary Materials:

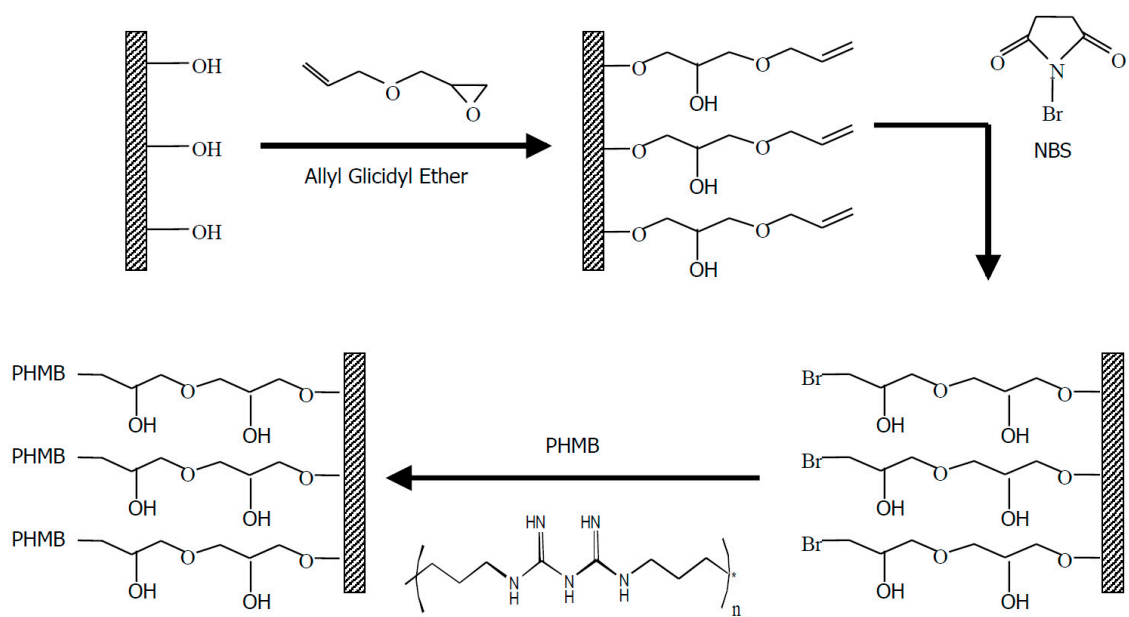

Figure S1. Structures for immobilization chemistry.
